# Supplementary material for: Peroxisomes exhibit compromised structure and matrix protein content in SARS-CoV-2-infected cells
Source: PubMed Central journal article supplement — Mol Biol Cell. 2021 Jul 1;32(14):1273–82. doi: 10.1091/mbc.E21-02-0074 (PMC8351553; doi:10.1091/mbc.e21-02-0074), 2021-07-01

# Supplemental Materials

*Molecular Biology of the Cell*

Knoblauch *et al.*

**FIGURE S1: Peroxisomal membrane morphology is altered in SK-N-SH cells infected with SARS-CoV-2.**

Cells were grown on coverslips, infected with SARS-CoV-2 at a MOI of 1 or mock-infected, and fixed at 24, 48 or 72 hpi. Cells were labeled with antibodies against PMP70 and PEX14. Cell nuclei were stained with DAPI. Cells were observed by IF confocal microscopy. Images presented are maximum intensity projections. Black and white images show single labeling by PMP70 or PEX14 antibodies. Squares in a, e, i and m are shown at higher magnification in d, h, l and p, respectively. Bars: 10  $\mu\text{m}$  (a-c, e-g, i-k, m-o), 2  $\mu\text{m}$  (d, h, l and p).

**FIGURE S2: SARS-CoV-2-infected SK-N-SH cells show redistribution of peroxisomal matrix proteins to the cytosol.**

Cells were grown on coverslips, infected with SARS-CoV-2 at a MOI of 1 or mock-infected, and fixed at 24, 48 or 72 hpi. Cells were labeled with antibodies against PMP70 and PTS1. Cell nuclei were stained with DAPI. Cells were observed by IF confocal microscopy. Images presented are maximum intensity projections. Black and white images show single labeling by PMP70 or PTS1 antibodies. Squares in a, e, i and m are shown at higher magnification in d, h, l and p, respectively. Bars: 10  $\mu\text{m}$  (a-c, e-g, i-k, m-o), 2  $\mu\text{m}$  (d, h, l and p).

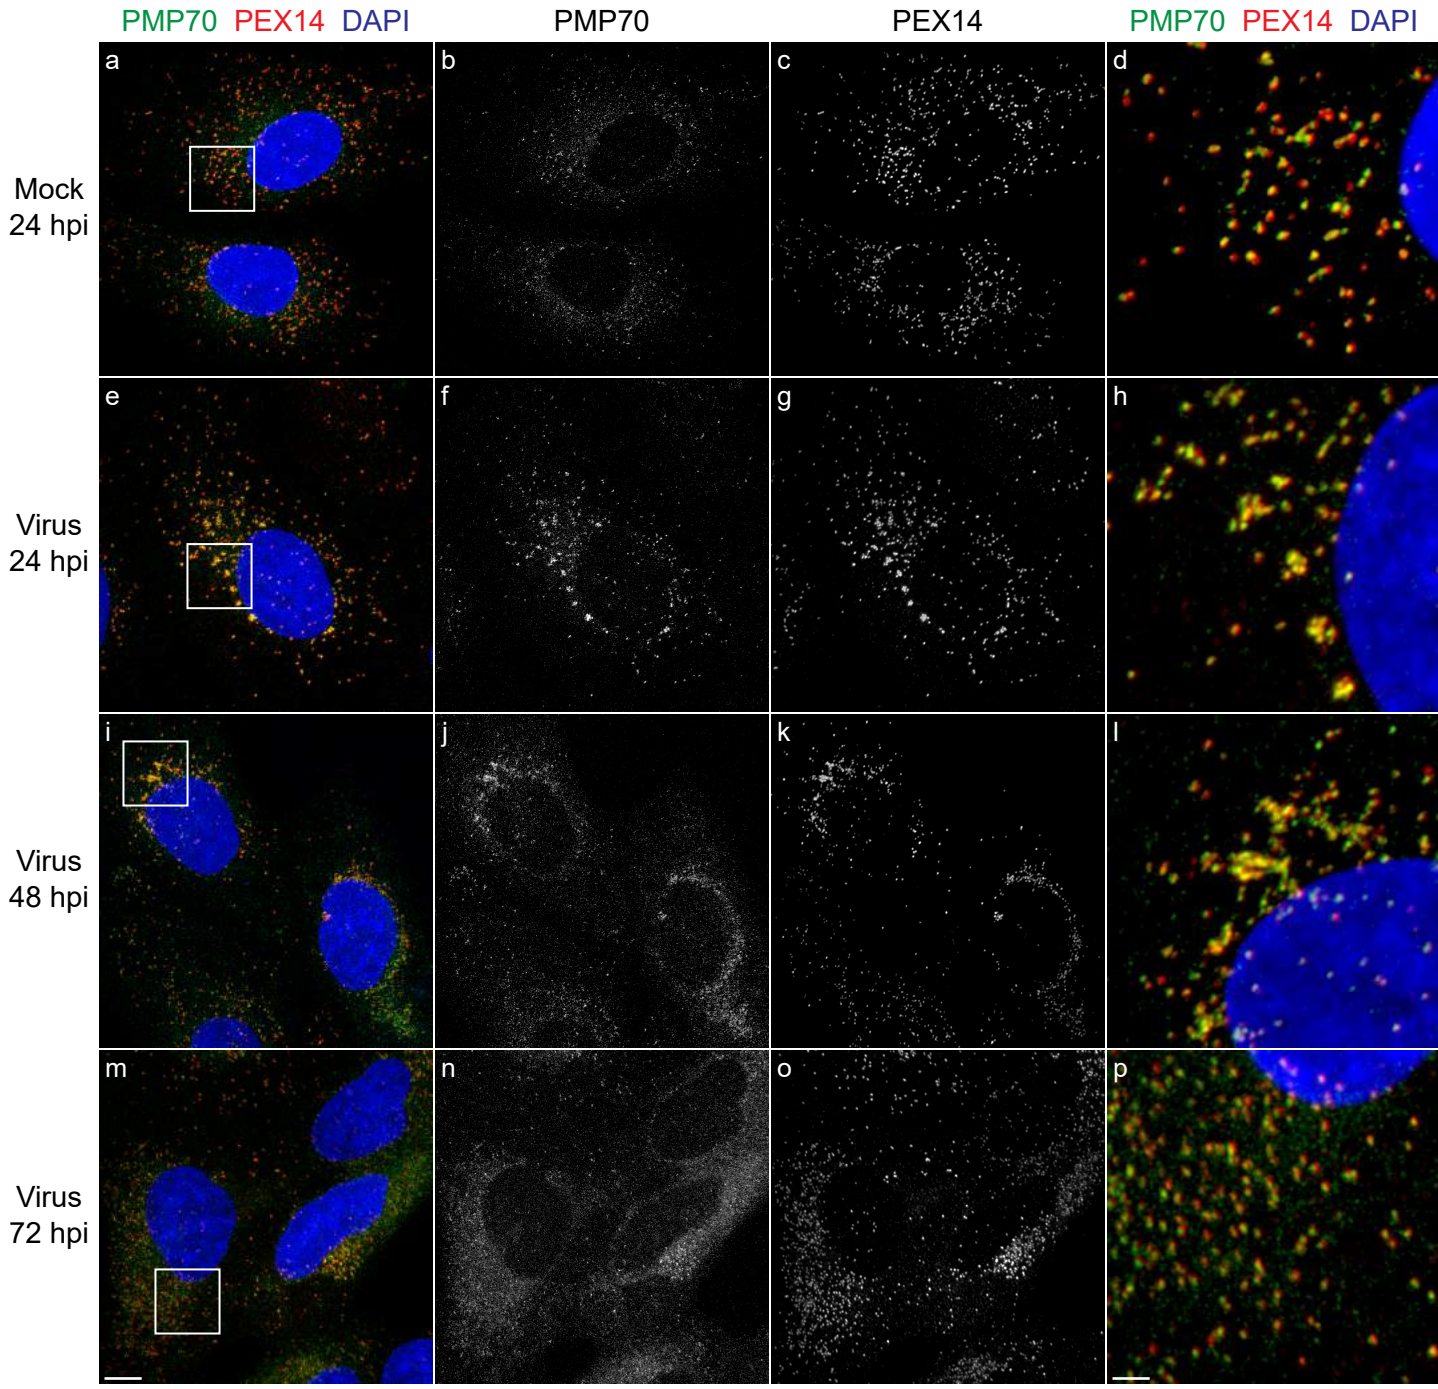

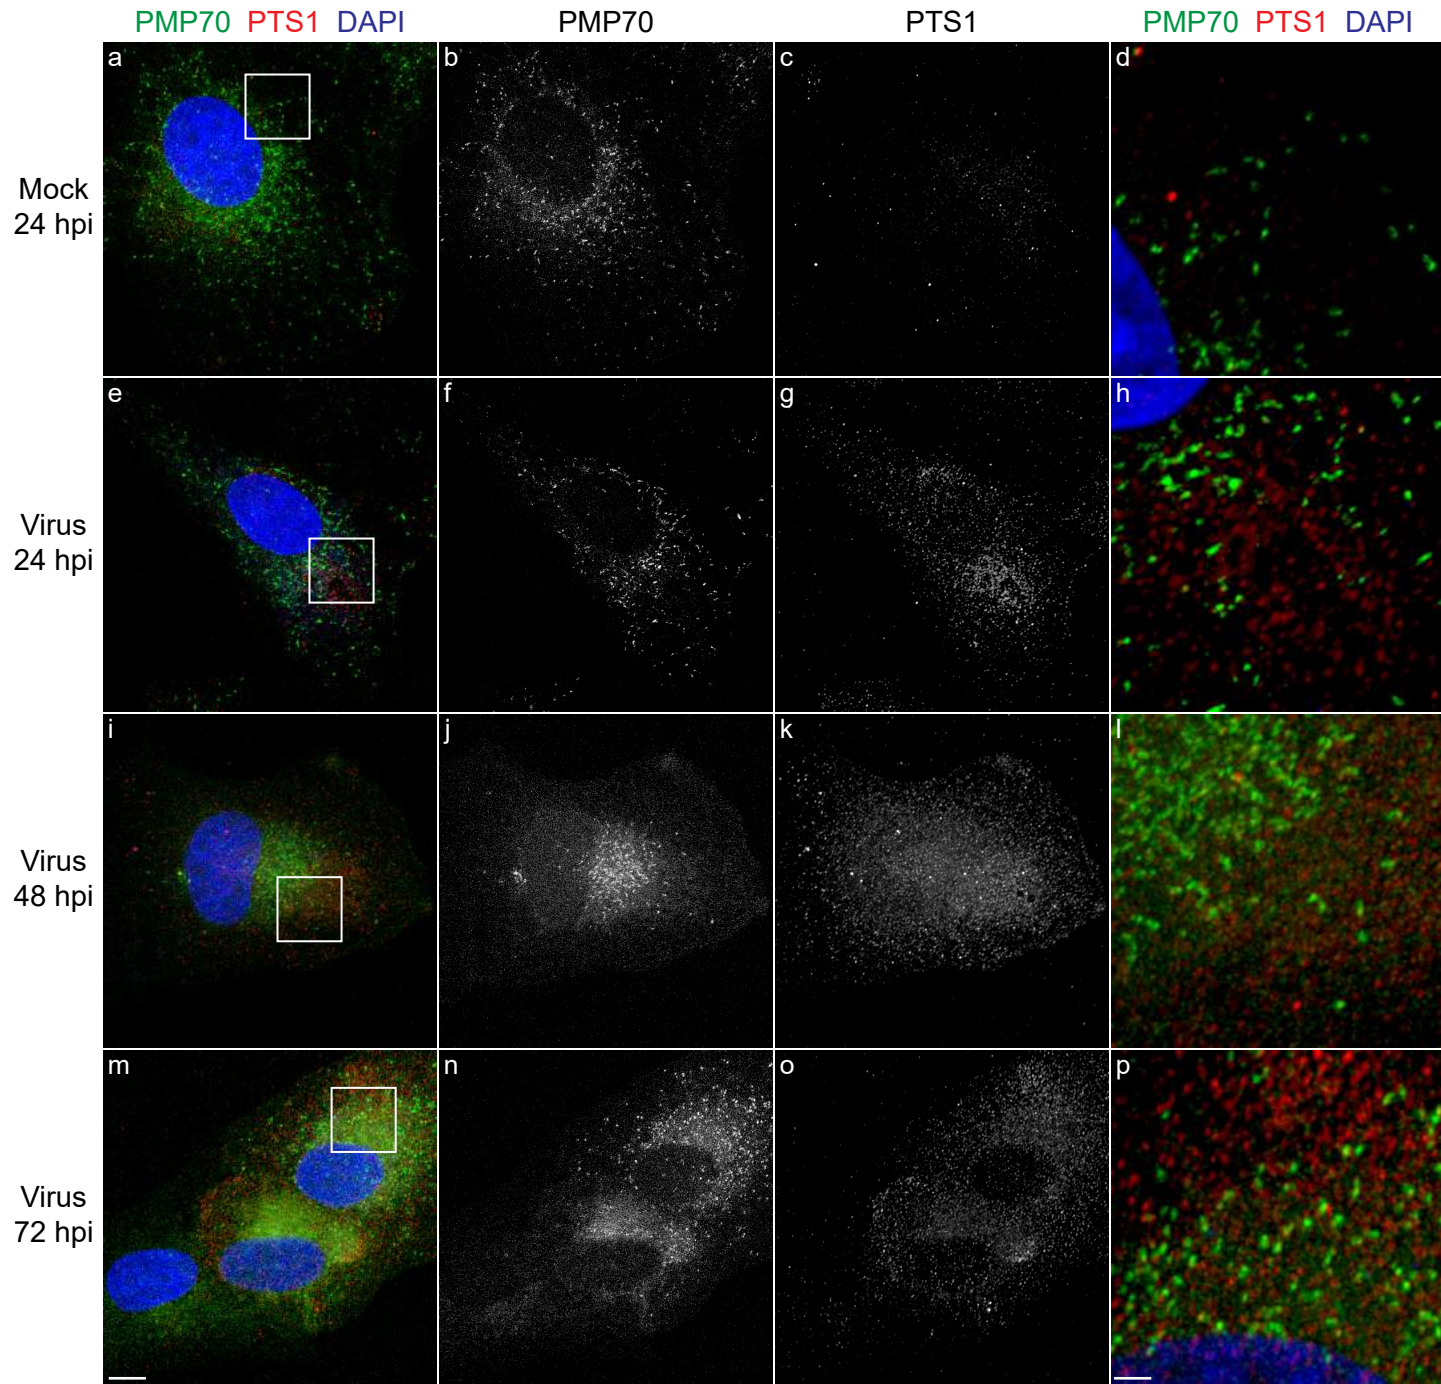

Supplement: mbc-32-1273-s001.pdf [file mbc-32-1273-s001.pdf]
